# Supplementary material for: Seasonal Colony Loss Rates and Honey Bee Management in the Kingdom of Saudi Arabia: Results of a Survey of Beekeepers
Source: MDPI journal article supplement (doi:10.3390/insects14060513), 2023-06-01
Supplement: s1 [file s1]

## Supplementary Materials

Questionnaire S1. Purpose-designed survey questionnaire used for data collection.

### **Saudi Honey bee loss and survival survey 2017/2018**

*The notes E ① etc. provide some essential information about the questions below.*

#### **About you as a beekeeper**

E ① Information about your name and address and personal details will be removed from the file used for processing the data and kept confidential.

First name \_\_\_\_\_  
Last name \_\_\_\_\_  
Address \_\_\_\_\_  
City \_\_\_\_\_  
Postal Code \_\_\_\_\_  
Email \_\_\_\_\_  
Phone number \_\_\_\_\_

- 1) What is your level of education? ☐ primary school ☐ middle school  
☐ secondary school ☐ university ☐ self-taught
- 2) What is your profession? .....
- 3) What kind of beekeeper are you?  
☐ A hobby beekeeper  
☐ A semi-professional beekeeper whose beekeeping provides a substantial part of their income  
☐ A professional whose beekeeping is their main income?
- 4) How many years have you been keeping bees? (You may state part of a year, e.g. 0.5 for half a year).
- 5) What influenced you to become a beekeeper? .....
- 6) Do you keep bees mainly to:  
☐ produce honey ☐ breed and sell bees (queens or nucleus colonies)  
☐ both the above ☐ Other (please specify) .....

#### **About your apiary**

- 7) To describe the location of your main apiary or operation, please state

- a) the name of a city/town/village near to your apiary? \_\_\_\_\_
- b) and the postal code of the apiary (or a postal code nearby \_\_\_\_\_
- 8) What is the name of the region where you keep your bees? \_\_\_\_\_
- 9) How many apiaries do you have?
- 10) If you have more than one apiary, are all your apiaries within a distance of about 15 km of each other? If you have only one apiary, please answer yes.  
☐ Yes ☐ No ☐ Don't know
- 11) What is the environment of your main apiary like?  
☐ Forest/woodland ☐ Cultivated field ☐ Orchard ☐ Garden/yard  
☐ Other (please specify)  
 .....
- 12) Is the location of your main apiary:  
☐ Sunny? ☐ Shaded? ☐ Sheltered/closed place?  
☐ Other? (please specify)  
 .....

### About your colonies and colony losses

E② In this questionnaire we try to gather information about production colonies. *Please consider colonies which are queenright and strong enough to provide a honey harvest as production colonies.*

- 13) How many production colonies did you have in total during  
 Spring 2017: ..... Summer 2017: ..... Autumn 2017: .....  
 Winter 2017–2018: ..... Spring 2018: .....

We are considering Spring as March to April, Summer as May to August, Autumn as September to October, and Winter as November to February.

E③ Please consider a colony as lost if it is dead (or reduced to a few hundred bees) or alive but with queen problems, like drone laying queens or no queen at all, which you couldn't solve.

- 14) Have you observed any losses of production colonies during the period from 2017 to 2018?  
☐ Yes ☐ No

- 14a) How many production colonies did you lose in total during  
 Spring 2017: ..... Summer 2017: ..... Autumn 2017: .....  
 Winter 2017–2018: ..... Spring 2018: .....

14b) If you lost colonies, what do you think are the main cause(s) of your colony losses from 2017 to 2018? You may specify more than one cause.

- ## About bee management and other matters

- 15a) If you answered Yes to 15, when did you move your bees and where did you move them?

.....

- 18) Do you keep your bees in an area where Varroa has still not been detected?  
☐ Yes ☐ No ☐ Don't know

- 19) Have you monitored your colonies for Varroa during the period April 2017-April 2018?  
☐ Yes ☐ No ☐ Don't know / not applicable
- 20) Have you treated your colonies against Varroa during the period April 2017 - April 2018?  
☐ Yes ☐ No ☐ Don't know / not applicable

[illegible]

|                                                                                              |  |  |  |  |  |  |  |  |  |  |  |  |  |
|----------------------------------------------------------------------------------------------|--|--|--|--|--|--|--|--|--|--|--|--|--|
| Hyperthermia (heat treatment of brood/bees)                                                  |  |  |  |  |  |  |  |  |  |  |  |  |  |
| Other biotechnical method (as e.g. trapping comb, complete brood removal, queen confinement) |  |  |  |  |  |  |  |  |  |  |  |  |  |
| Formic acid - short term                                                                     |  |  |  |  |  |  |  |  |  |  |  |  |  |
| Formic acid - long term (e.g. MAQS)                                                          |  |  |  |  |  |  |  |  |  |  |  |  |  |
| Lactic acid                                                                                  |  |  |  |  |  |  |  |  |  |  |  |  |  |
| Oxalic acid - trickling                                                                      |  |  |  |  |  |  |  |  |  |  |  |  |  |
| Oxalic acid - sublimation (evaporation)                                                      |  |  |  |  |  |  |  |  |  |  |  |  |  |
| Hiveclean/Bienenwohl/Beevital                                                                |  |  |  |  |  |  |  |  |  |  |  |  |  |
| Thymol (e.g. Apiguard, ApilifeVar)                                                           |  |  |  |  |  |  |  |  |  |  |  |  |  |
| Tau-fluvalinate (e.g. Apistan)                                                               |  |  |  |  |  |  |  |  |  |  |  |  |  |
| Flumethrin (e.g. Bayvarol)                                                                   |  |  |  |  |  |  |  |  |  |  |  |  |  |
| Amitraz (in strips, e.g. Apivar, Apitraz)                                                    |  |  |  |  |  |  |  |  |  |  |  |  |  |
| Amitraz (fumigation/aerosol)                                                                 |  |  |  |  |  |  |  |  |  |  |  |  |  |
| Coumaphos (e.g. Perizin)                                                                     |  |  |  |  |  |  |  |  |  |  |  |  |  |
| Coumaphos (in strips, e.g. Checkmite+)                                                       |  |  |  |  |  |  |  |  |  |  |  |  |  |
| Another chemical product                                                                     |  |  |  |  |  |  |  |  |  |  |  |  |  |
| Another method                                                                               |  |  |  |  |  |  |  |  |  |  |  |  |  |

22) Have you noticed bees with crippled/deformed wings in your colonies? (These are signs of the presence of Deformed Wing Virus, which is spread by Varroa mites).

☐ Not at all   ☐ to a limited extent   ☐ to a large extent   ☐ Don't know

23) Which of the following measures apply for the majority of your beekeeping:

- a) Screened bottom board ☐ Yes ☐ No ☐ Don't know
- b) Insulated hives ☐ Yes ☐ No ☐ Don't know
- c) Plastic hives ☐ Yes ☐ No ☐ Don't know
- d) Certified organic beekeeping ☐ Yes ☐ No ☐ Don't know
- e) Varroa tolerant stock ☐ Yes ☐ No ☐ Don't know
- f) Small brood cell size (5.1 mm or less) ☐ Yes ☐ No ☐ Don't know
- g) Natural comb (without foundation) ☐ Yes ☐ No ☐ Don't know
- h) Purchase wax from outside own operation ☐ Yes ☐ No ☐ Don't know

24) Are there pests which are a threat to the honey bees in your apiary/apiaries?

☐ Yes ☐ No ☐ Don't know

24a) If you answered Yes to 24, what are these pests?.....

.....  
 .....

25) Do you protect your colonies from the weather? ☐ Yes ☐ No

25a) If you answered yes to 25, which methods do you use?

.....  
 .....  
 .....

26) What strain/race of bees do you mostly keep in your apiary/apiaries?

- ☐ Local hybrid of no specific race ☐ The Yemeni honey bee  
☐ The Carniolan honey bee ☐ The Italian honey bee  
☐ Other race (please specify which one)

.....

27) Do you replace queens? ☐ Yes ☐ No

27a) If your answer to 27 was yes, in which case do you replace queens?

- ☐ Only in case of loss of queen  
☐ Replaced yearly  
☐ In case of poor egg laying by the queen  
☐ Other (please specify).

.....

28) Do you feel that you have any needs for training or support in your beekeeping?

28a) If you answered yes to 28, what are these training needs? .....

29) Are there any other concerns that you have in your beekeeping which have not been asked about above?

If yes, please say what these are:

.....

.....

Thank you very much for your time in answering these questions. We hope that they will give a useful picture of beekeeping in Saudi Arabia and in particular that by studying colony losses, some possible risk factors for colony loss may be identified and followed up.

**Table S1.** Number of beekeepers visited in each region and response rates.

| Region visited | Dates of visits          | No. of members | No. of contacts (% of members) | No. visited (% of members) | % of contacts visited | Total no. of respondents (visits and online) | % of beekeepers in survey |
|----------------|--------------------------|----------------|--------------------------------|----------------------------|-----------------------|----------------------------------------------|---------------------------|
| Makkah         | 10/05/2018 to 20/05/2018 | 88             | 20 (22.7%)                     | 13 (14.8%)                 | 65.0%                 | 15                                           | 13.8%                     |
| Taif           | 21/05/2018 to 03/06/2018 | 56             | 22 (39.3%)                     | 16 (28.6%)                 | 72.7%                 | 17                                           | 15.6%                     |
| AlBaha         | 04/06/2018 to 17/06/2018 | 115            | 20 (17.4%)                     | 15 (13.0%)                 | 75.0%                 | 21                                           | 19.3%                     |
| Abha           | 18/06/2018 to 01/07/2018 | 47             | 21 (44.7%)                     | 17 (36.2%)                 | 80.9%                 | 19                                           | 17.4%                     |
| Rijal Almaa    | 02/07/2018 to 15/07/2018 | 32             | 15 (46.9%)                     | 7 (21.9%)                  | 46.6%                 | 7                                            | 6.4%                      |
| Jazan          | 16/07/2018 to 29/07/2018 | 60             | 19 (31.7%)                     | 14 (23.3%)                 | 73.6%                 | 14                                           | 12.8%                     |
| Najran         | 30/07/2018 to 12/08/2018 | 29             | 24 (82.8%)                     | 16 (55.2%)                 | 66.6%                 | 16                                           | 14.7%                     |
| Total          | -                        | 427            | 141 (33.0%)                    | 98 (23.0%)                 | 69.5%                 | 109                                          | 100.0%                    |
